# Supplementary material for: Dietary Walnuts Preserve Aspects of Health Span and Alter the Hippocampal Lipidome in Aged High-Fat Diet-Fed Mice
Source: Int J Mol Sci. 2023 Jan 24;24(3):2314. doi: 10.3390/ijms24032314 (PMC9916809; doi:10.3390/ijms24032314)
Supplement: Supplementary file 1 [file ijms-24-02314-s001.zip › ijms-2159067-supplementary Table S1.xlsx]

## Sheet: Table S1-U
Ensembl_gene_id	Mgi_symbol	Gene_biotype	Diff = (HFD)-(HFDW)	Diff = (HFD)-(LFD)	Diff = (HFDW)-(LFD)	p-value for Diff = (HFD)-(HFDW)	p-value for Diff = (HFD)-(LFD)	p-value for Diff = (HFDW)-(LFD)
ENSMUSG00000106176	Gm43730	processed_pseudogene	-4.875	-0.725	4.15	6.41058e-06	0.371865	2.75209e-05
ENSMUSG00000096257	Ccer2	protein_coding	9	6.175	-2.825	8.36057e-06	0.000414848	0.0719863
ENSMUSG00000021553	Slc28a3	protein_coding	-10.875	-2.5	8.375	1.08604e-05	0.188517	0.000146539
ENSMUSG00000032556	Bfsp2	protein_coding	-24.5	-15.175	9.325	1.62675e-05	0.00173438	0.0399632
ENSMUSG00000019987	Arg1	protein_coding	3.875	3.7	-0.175	2.16368e-05	1.98795e-05	0.802648
ENSMUSG00000098896	Mir3473g	miRNA	-3.5	-0.225	3.275	2.6199e-05	0.726101	3.12566e-05
ENSMUSG00000080790	Gm7638	processed_pseudogene	2.625	2.075	-0.55	2.8681e-05	0.000247359	0.262886
ENSMUSG00000112558	Gm32364	lincRNA	2.875	1.975	-0.9	2.94438e-05	0.001031	0.10049
ENSMUSG00000100281	4930422M22Rik	antisense	22.625	3.675	-18.95	3.0414e-05	0.384957	0.00013697
ENSMUSG00000037593	Rskr	protein_coding	84.875	30.825	-54.05	4.34499e-05	0.0666726	0.00260853
ENSMUSG00000068324	Gm10029	processed_pseudogene	2.625	1.625	-1	4.68432e-05	0.0034334	0.0566312
ENSMUSG00000097286	Gm26684	bidirectional_promoter_lncRNA	-16.875	-0.75	16.125	7.14716e-05	0.823051	6.55197e-05
ENSMUSG00000026686	Lmx1a	protein_coding	-8.75	-1.075	7.675	7.31669e-05	0.538745	0.000180954
ENSMUSG00000049946	BC030500	protein_coding	-59.625	-29.475	30.15	7.42584e-05	0.0196518	0.0173014
ENSMUSG00000116657	Gm49774	antisense	2.75	2.775	0.025	8.37438e-05	3.9431e-05	0.963979
ENSMUSG00000097305	Gm17276	antisense	16	9.1	-6.9	0.000105363	0.0101451	0.0446502
ENSMUSG00000087381	Gm16008	antisense	21.125	1.55	-19.575	0.000107237	0.721534	0.00014053
ENSMUSG00000039236	Isg20	protein_coding	14	10.15	-3.85	0.000138198	0.00198805	0.198899
ENSMUSG00000032363	Adamts7	protein_coding	-13.625	-5.15	8.475	0.00015694	0.0853398	0.00704083
ENSMUSG00000097178	2310002F09Rik	processed_transcript	-47.375	-26.5	20.875	0.000159358	0.0140846	0.0475731
ENSMUSG00000038793	Lefty1	protein_coding	-112.125	-71.25	40.875	0.000208406	0.00724552	0.104485
ENSMUSG00000085334	Gm12940	processed_transcript	148.625	-38.175	-186.8	0.000214664	0.247061	6.37942e-06
ENSMUSG00000020287	Mpg	protein_coding	36.375	13.825	-22.55	0.000216441	0.0923696	0.00876469
ENSMUSG00000086495	Gm13778	processed_transcript	4.25	2.55	-1.7	0.000225042	0.0110827	0.0784562
ENSMUSG00000084890	A830036E02Rik	antisense	274.625	108.25	-166.375	0.000226231	0.0827508	0.0104545
ENSMUSG00000102625	Gm37672	TEC	5.25	3.15	-2.1	0.000239088	0.0114784	0.0800198
ENSMUSG00000082651	Gm14001	processed_pseudogene	6.375	2.825	-3.55	0.000282901	0.0577417	0.0195558
ENSMUSG00000082186	Gm12403	processed_pseudogene	2.25	1.15	-1.1	0.000309129	0.031885	0.0393084
ENSMUSG00000036169	Sostdc1	protein_coding	-188.25	-6.075	182.175	0.000328368	0.887203	0.000265902
ENSMUSG00000106446	Gm42970	TEC	3.125	1.725	-1.4	0.000336556	0.0224342	0.059026
ENSMUSG00000106862	Gm42811	TEC	2.875	2.975	0.1	0.000370494	0.00014426	0.879879
ENSMUSG00000097649	Gm10561	antisense	34.125	-14	-48.125	0.000384733	0.0856674	2.68278e-06
ENSMUSG00000113302	Gm32219	lincRNA	2.625	2.85	0.225	0.000413339	9.36245e-05	0.712855
ENSMUSG00000085279	Gm15965	antisense	-2.375	0.4	2.775	0.00050776	0.480322	4.93453e-05
ENSMUSG00000111308	Gm48710	TEC	5.875	-0.35	-6.225	0.000574027	0.80429	0.00017954
ENSMUSG00000055235	Wdr86	protein_coding	-38.625	4.075	42.7	0.000761013	0.670279	0.000154304
ENSMUSG00000098164	Gm5493	lincRNA	3.125	3.175	0.05	0.000941167	0.000483082	0.949557
ENSMUSG00000015806	Qdpr	protein_coding	-340.125	-418.925	-78.8	0.00105639	6.55948e-05	0.369858
ENSMUSG00000086662	BC046251	lincRNA	6.875	7.6	0.725	0.00110897	0.000240464	0.682608
ENSMUSG00000026173	Plcd4	protein_coding	49.75	-32.225	-81.975	0.00114534	0.0185111	1.40142e-06
ENSMUSG00000115049	Gm49172	processed_transcript	22.75	-6.8	-29.55	0.00130175	0.260627	4.52961e-05
ENSMUSG00000103252	Gm37521	TEC	1.875	2.2	0.325	0.0017976	0.000227062	0.525481
ENSMUSG00000097974	Gm10605	lincRNA	28.125	-21.5	-49.625	0.00186123	0.00944911	1.13982e-06
ENSMUSG00000050377	Il31ra	protein_coding	4.125	4.975	0.85	0.00292048	0.000315917	0.476948
ENSMUSG00000102219	Gm6606	unprocessed_pseudogene	3.125	-1.225	-4.35	0.00389887	0.197938	9.64286e-05
ENSMUSG00000104231	Gm37592	antisense	9	10.85	1.85	0.00401358	0.000482451	0.495515
ENSMUSG00000115146	Gm4681	lincRNA	-3.75	1.975	5.725	0.00769022	0.118539	9.82406e-05
ENSMUSG00000075425	Gm13547	protein_coding	3.875	-2.15	-6.025	0.00857852	0.10635	9.59164e-05
ENSMUSG00000102215	Gm2464	lincRNA	-11.125	-15.275	-4.15	0.00877682	0.000392326	0.27173
ENSMUSG00000041915	Ammecr1l	protein_coding	44.25	-31.225	-75.475	0.0133531	0.0581526	7.30223e-05
ENSMUSG00000053318	Slamf8	protein_coding	1.875	2.9	1.025	0.0164301	0.000325431	0.149409
ENSMUSG00000073779	Lrp8os2	antisense	8.5	14.175	5.675	0.02048	0.000220831	0.0931444
ENSMUSG00000104432	A430027C01Rik	TEC	-1.5	-2.9	-1.4	0.0230388	5.11059e-05	0.0251015
ENSMUSG00000032285	Dnaja4	protein_coding	-71.125	-153.6	-82.475	0.0742011	0.000296091	0.0317766
ENSMUSG00000078813	Leng1	protein_coding	15.25	-28.95	-44.2	0.0754715	0.00110977	8.61546e-06
ENSMUSG00000073374	C030034I22Rik	lincRNA	7.75	-15.15	-22.9	0.133694	0.00394662	6.90344e-05
ENSMUSG00000025157	Zdhhc16	protein_coding	18.5	-32.85	-51.35	0.137759	0.00849041	0.000162225
ENSMUSG00000022160	Mettl3	protein_coding	-21.625	-54.575	-32.95	0.142707	0.000512496	0.0229255
ENSMUSG00000032383	Ppib	protein_coding	43.5	-110.725	-154.225	0.143717	0.000482865	9.28283e-06
ENSMUSG00000045176	Borcs6	protein_coding	-18.5	-50.5	-32	0.155824	0.00032369	0.0135112
ENSMUSG00000103622	Gm38391	TEC	-2.375	-7.025	-4.65	0.18943	0.000328418	0.0103857
ENSMUSG00000021643	Serf1	protein_coding	5.125	-12.35	-17.475	0.205317	0.00304902	0.000102093
ENSMUSG00000058239	Usf2	protein_coding	28.2499	-100	-128.25	0.285744	0.000463379	2.64096e-05
ENSMUSG00000000916	Nsun5	protein_coding	13	-47.875	-60.875	0.305124	0.00047073	3.00788e-05
ENSMUSG00000038268	Ovca2	protein_coding	7.125	-29.275	-36.4	0.368769	0.000605106	5.45337e-05
ENSMUSG00000032040	Dcps	protein_coding	-9.375	-40.425	-31.05	0.37068	0.000387287	0.00409772
ENSMUSG00000030815	Phkg2	protein_coding	13	-79.025	-92.025	0.540929	0.000595674	0.00011671
ENSMUSG00000058600	Rpl30	protein_coding	16	-175.05	-191.05	0.681785	7.87393e-05	2.66141e-05
ENSMUSG00000108288	Gm44202	lincRNA	-0.25	-2.45	-2.2	0.691474	0.000385871	0.00110274
ENSMUSG00000023050	Map3k12	protein_coding	-12.004	-203.686	-191.682	0.808667	0.000217904	0.000415827
ENSMUSG00000022681	Ntan1	protein_coding	2.625	-67.9	-70.525	0.879182	0.000349858	0.000233603
ENSMUSG00000019710	Mrpl24	protein_coding	1.375	-70.525	-71.9	0.921408	1.76915e-05	1.36754e-05
ENSMUSG00000059325	Hopx	protein_coding	-1.875	-102.875	-101	0.939238	0.000180163	0.000220634
